# Supplementary material for: Effect of hydrothermal treatment on plutonium retention in deep liquid radioactive waste disposal
Source: Royal Society of Chemistry journal article supplement (doi:10.1039/d4em00516c), 2025-01-01
Supplement: d4em00516c1.pdf [file d4em00516c1.pdf]

## Supplementary Material

# Effect of Hydrothermal Treatment on Plutonium Retention in Deep Liquid Radioactive Waste Disposal

Tolganay B. Egorova<sup>a</sup>, Anna Yu. Romanchuk<sup>a</sup>, Alexander V. Egorov<sup>a</sup>, Alexander L. Trigub<sup>b</sup>,  
Elena V. Zakharova<sup>c</sup>, Anna G. Volkova<sup>c</sup>, Andrey A. Zubkov<sup>d</sup>, Irina E. Vlasova<sup>a,\*</sup>,  
Stepan N. Kalmykov<sup>a</sup>

- a. Lomonosov Moscow State University, Department of Chemistry, Leninskie Gory 1/3, 119991 Moscow, Russia
- b. National Research Centre «Kurchatov Institute», Akademika Kurchatova pl. 1, 123182 Moscow, Russia
- c. Frumkin Institute of Physical Chemistry and Electrochemistry of Russian Academy of Science, 31–4, Leninsky prospect, 119071, Moscow, Russia
- d. JSC Siberian Chemical Combine, 1 st. Kurchatova 636039, Seversk, Tomsk region, Russia

File contains 4 pages, 4 figures, 1 table.

### Table of contents

|                                                                             |           |
|-----------------------------------------------------------------------------|-----------|
| The PXRD pattern of the disposal sand used for the experiments              | Figure S1 |
| The results of PXRD analysis of disposal sand                               | Table S1  |
| Room-temperature sorption of Pu from model LRW                              | Figure S2 |
| Pu L <sub>3</sub> -edge XANES spectra of studied samples                    | Figure S3 |
| Structural parameters obtained from the fitting of EXAFS spectra            | Table S2  |
| EDX spectrum and SAED pattern of LRW sediments agglomerate in Sample 2      | Figure S4 |
| EDX spectra and SAED pattern of LRW sediments agglomerate in Sample 2       | Figure S5 |
| Plutonium oxidation states in acidic leachates assessed by HDEHP extraction | Table S3  |

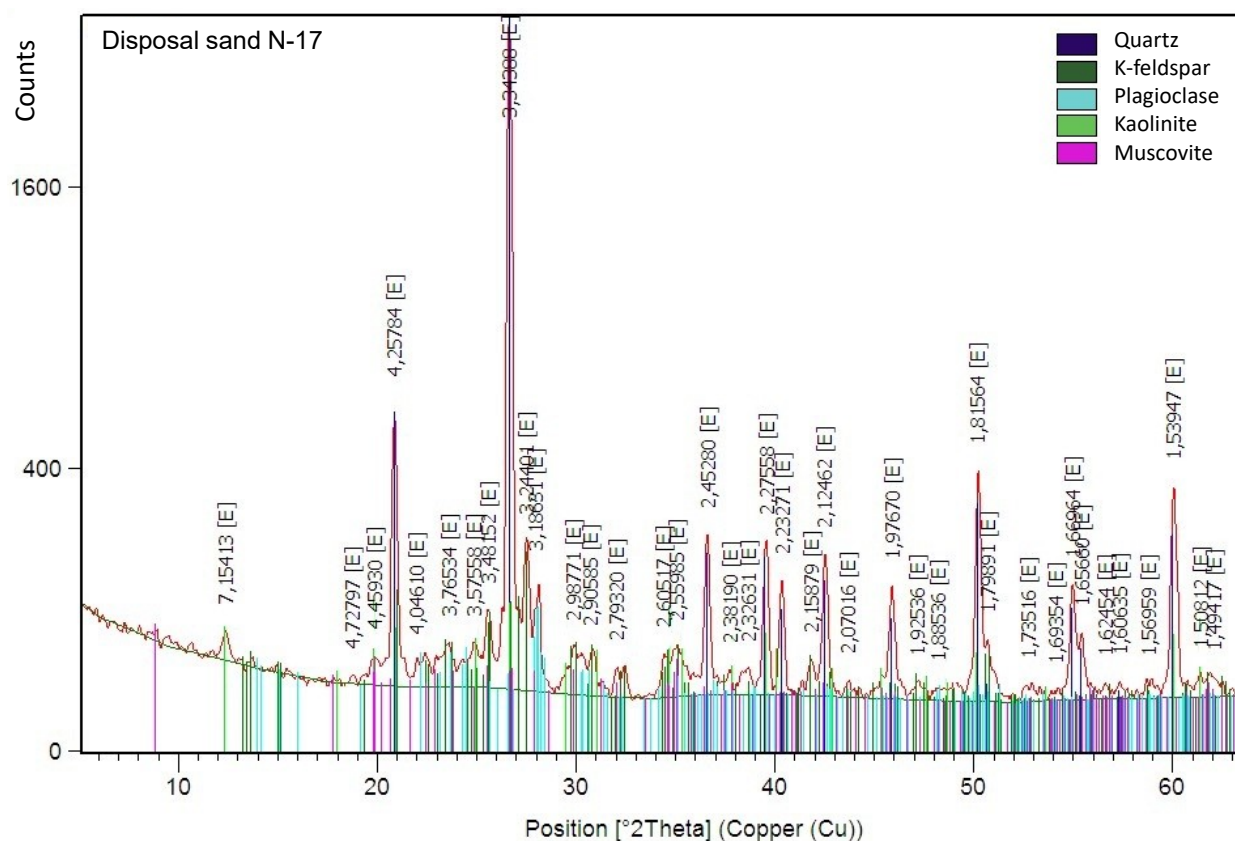

Fig. S1. The PXRD pattern of the disposal sand used for the experiments.

Table S1. The results of PXRD analysis of disposal sand

| Mineral name              | Chemical formula                                                                                                    | Mass fraction, % |
|---------------------------|---------------------------------------------------------------------------------------------------------------------|------------------|
| Quartz                    | SiO <sub>2</sub>                                                                                                    | 65               |
| K-feldspar                | KAlSi <sub>3</sub> O <sub>8</sub>                                                                                   | 14               |
| Plagioclase               | (Na,Ca)[Al(Al,Si)Si <sub>2</sub> O <sub>8</sub> ]                                                                   | 5                |
| Chlorite                  | (Mg,Fe) <sub>3</sub> (Si,Al) <sub>4</sub> O <sub>10</sub> (OH) <sub>2</sub> ·(Mg,Fe) <sub>3</sub> (OH) <sub>6</sub> | 1.5              |
| Muscovite                 | KAl <sub>2</sub> (AlSi <sub>3</sub> O <sub>10</sub> )(OH) <sub>2</sub>                                              | 0.5              |
| Kaolinite                 | Al <sub>2</sub> (Si <sub>2</sub> O <sub>5</sub> )(OH) <sub>4</sub>                                                  | 12               |
| Sum of crystalline phases |                                                                                                                     | 98               |

The sample may contain goethite, siderite, aragonite and pyroxene at the level of the detection limit

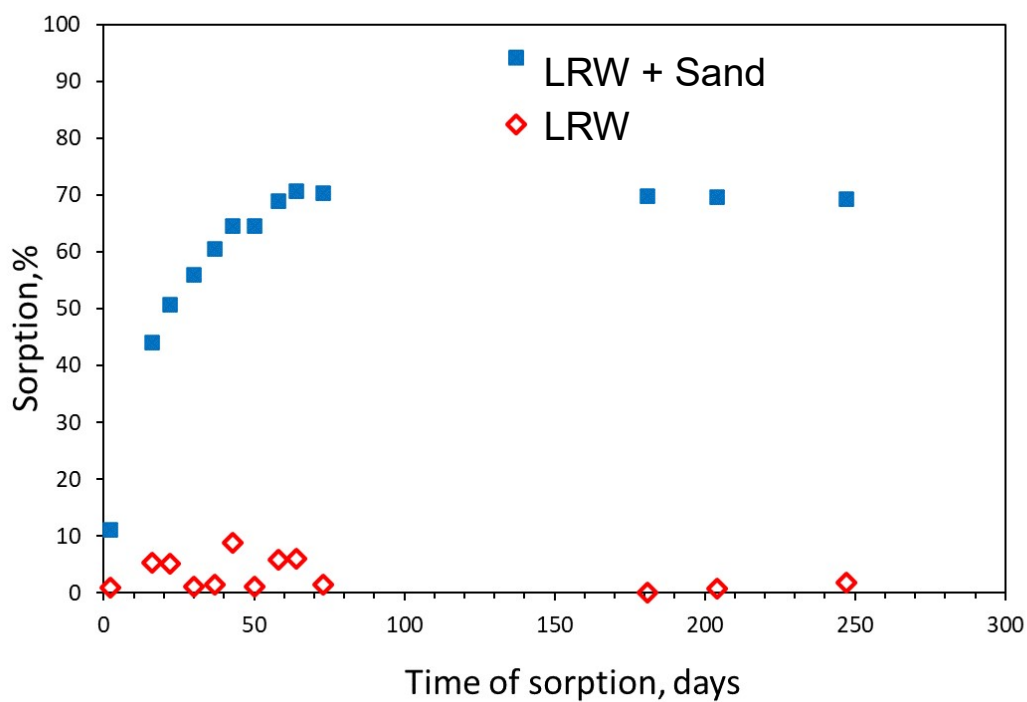

Fig. S2. Room-temperature sorption of Pu from model LRW solutions in the presence and absence of disposal sand ( $T = 22^{\circ}\text{C}$ ,  $[\text{Pu}]_{\text{tot}} = 10^{-7} \text{ M}$ ,  $[\text{Sand}] = 100 \text{ g/L}$ ,  $\text{pH}_i = 2.4$ ).

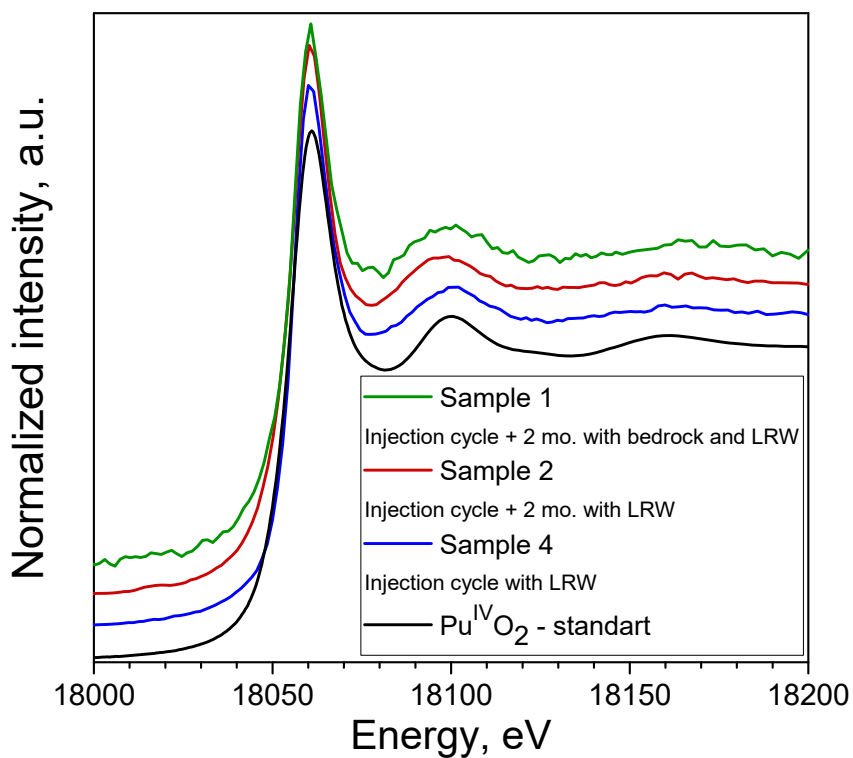

Fig. S3. Pu L<sub>3</sub>-edge XANES spectra of studied samples in comparison with Pu(IV) standard.

Table S2. Structural parameters obtained from the fitting of EXAFS spectra

| Sample   | Shell |           |                           |          |           |                             | R-factor |
|----------|-------|-----------|---------------------------|----------|-----------|-----------------------------|----------|
|          | Pu-O  |           |                           | Pu-Fe    |           |                             |          |
|          | CN    | R, Å      | $\sigma$ , Å <sup>2</sup> | N        | R, Å      | $\sigma^2$ , Å <sup>2</sup> |          |
| Sample 2 | 8*    | 2.25±0.02 | 0.014±0.001               | 4.0±1.4  | 3.43±0.03 | 0.015*                      | 0.026    |
| Sample 4 | 8*    | 2.25±0.03 | 0.017±0.001               | 2.21±1.1 | 3.43±0.04 | 0.015*                      | 0.019    |

CN – Coordination number, R – Interatomic distance,  $\sigma^2$  – Debye– Waller factor, k-range = 3 – 9 Å<sup>-1</sup>; R-range = 1.2 – 3.4 Å

\* - fixed values

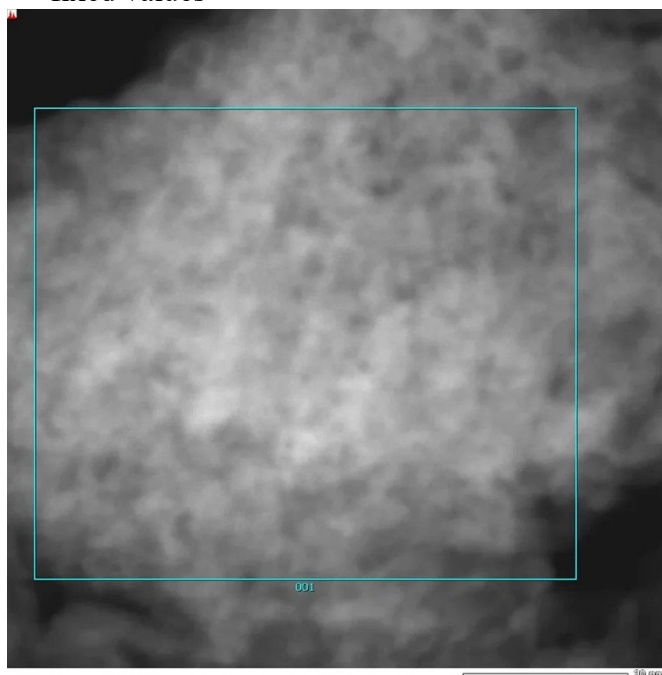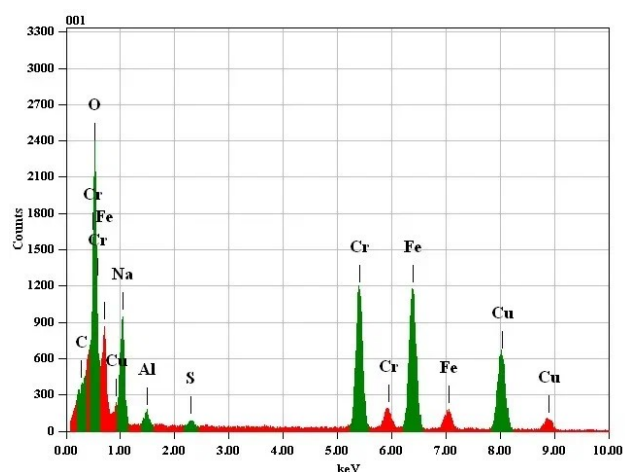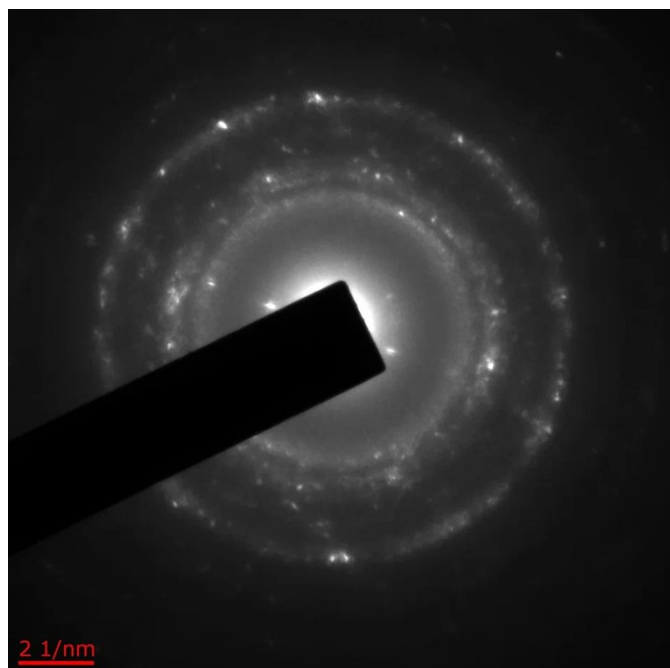

Fig. S4. EDX spectrum and SAED pattern of LRW sediments agglomerate in Sample 2 (One injection cycle, 2 months conditioning with LRW).

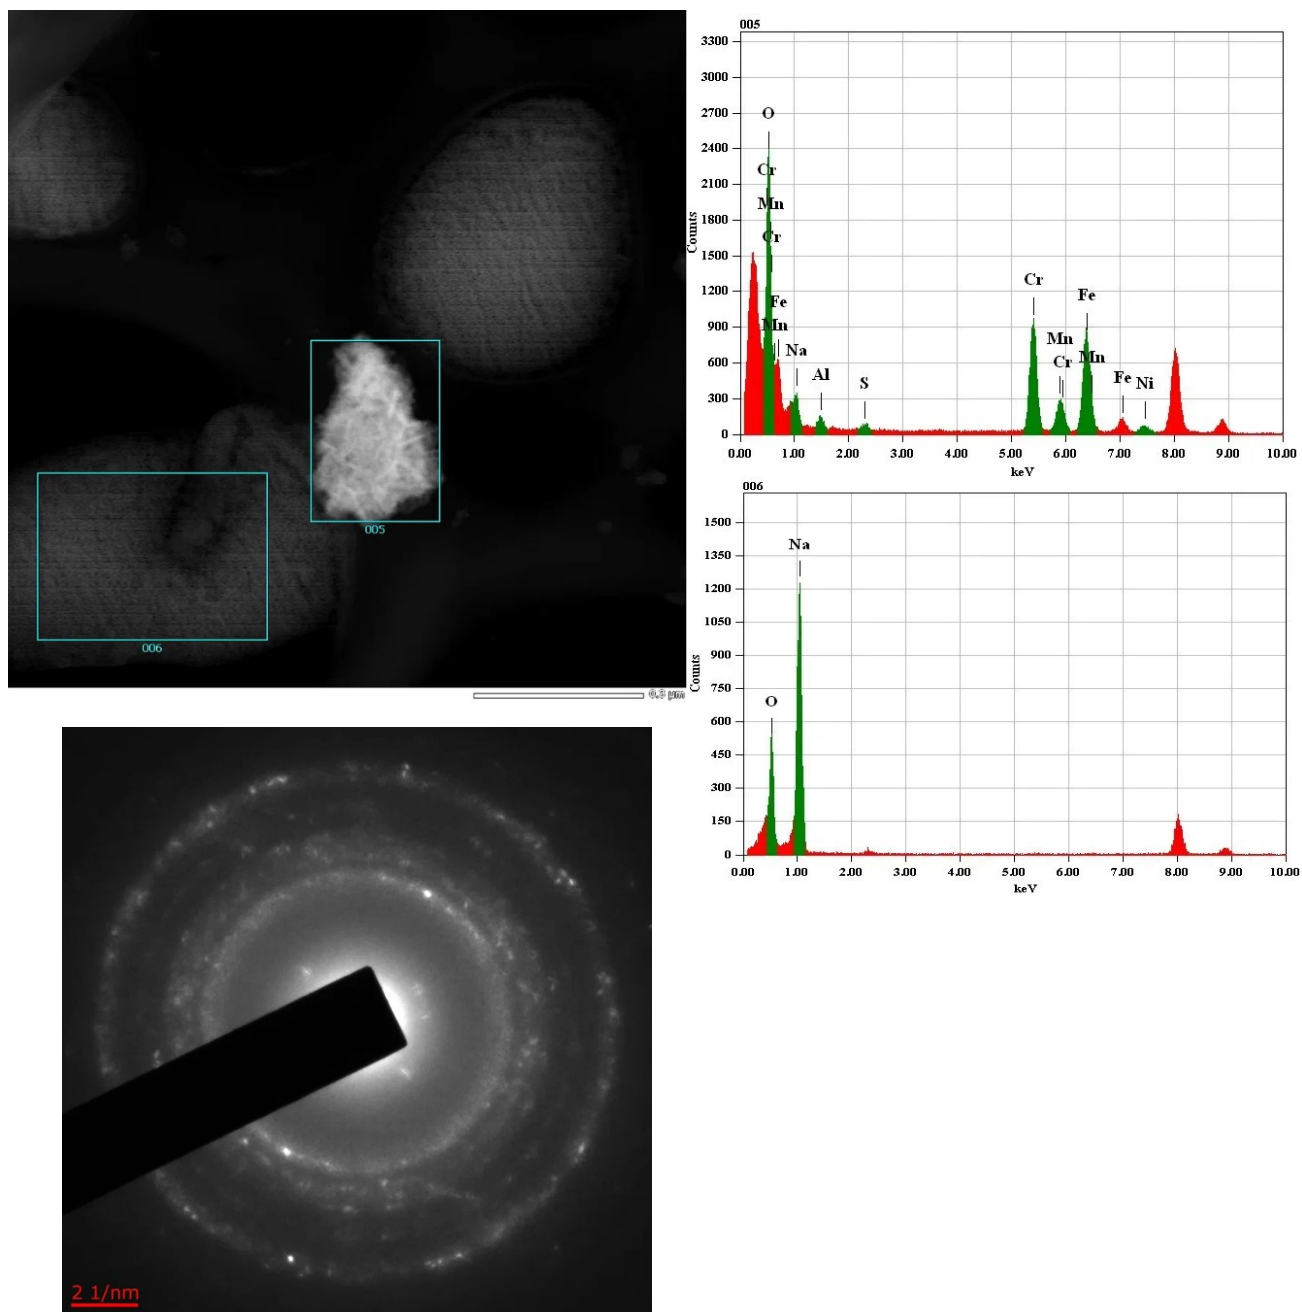

Fig. S5. EDX spectra and SAED pattern of LRW sediments agglomerate in Sample 2 (One injection cycle, 2 months conditioning with LRW).

Table S3. Plutonium oxidation states in acidic leachates assessed by HDEHP extraction

| Conditions                                                     | Extraction, %         |                                |
|----------------------------------------------------------------|-----------------------|--------------------------------|
|                                                                | Aqueous phase (Pu(V)) | Organic phase (Pu(IV), Pu(VI)) |
| One injection cycle, 150°C, LRW                                | 77                    | 23                             |
| One injection cycle, 150°C, LRW+Sand                           | 81                    | 19                             |
| Three injection cycles, 150°C, LRW+Sand, 3 months conditioning | 71                    | 29                             |
